# Supplementary material for: Variability in German Cockroach Extract Composition Greatly Impacts T Cell Potency in Cockroach-Allergic Donors
Source: Front Immunol. 2019 Feb 27;10:313. doi: 10.3389/fimmu.2019.00313 (PMC6413722; doi:10.3389/fimmu.2019.00313)
Supplement: Supplemental Table 1 — Mass spec anaysis of 12 difffernt german cockroach extracts. [file Table_1.XLSX]

## Sheet: Tryptic peptide transitions BLA
Supplemental Table 1. Mass spec anaysis of 12 difffernt german cockroach extracts.
Protein Name	Peptide Modified Sequence	Precursor Mz	Precursor Charge	Product Mz	Product Charge	Fragment Ion	Fragment Ion Type	Fragment Ion Ordinal	Library Rank	Library Intensity
Biognosys standards	GAGSSEPVTGLDAK	644.823	2	1016.53	1	y10	y	10	2	420
Biognosys standards	GAGSSEPVTGLDAK	644.823	2	929.494	1	y9	y	9	5	248
Biognosys standards	GAGSSEPVTGLDAK	644.823	2	800.451	1	y8	y	8	1	1432
Biognosys standards	GAGSSEPVTGLDAK	644.823	2	604.33	1	y6	y	6	3	392
Biognosys standards	GAGSSEPVTGLDAK	644.823	2	503.282	1	y5	y	5	4	268
Biognosys standards	VEATFGVDESNAK	683.828	2	1138.54	1	y11	y	11	4	61
Biognosys standards	VEATFGVDESNAK	683.828	2	1067.5	1	y10	y	10	5	54
Biognosys standards	VEATFGVDESNAK	683.828	2	966.453	1	y9	y	9	3	81
Biognosys standards	VEATFGVDESNAK	683.828	2	819.384	1	y8	y	8	1	125
Biognosys standards	VEATFGVDESNAK	683.828	2	663.294	1	y6	y	6	6	54
Biognosys standards	YILAGVENSK	547.298	2	817.441	1	y8	y	8	1	1396
Biognosys standards	YILAGVENSK	547.298	2	704.357	1	y7	y	7	2	702
Biognosys standards	YILAGVENSK	547.298	2	633.32	1	y6	y	6	3	662
Biognosys standards	YILAGVENSK	547.298	2	477.23	1	y4	y	4	6	211
Biognosys standards	YILAGVENSK	547.298	2	390.239	1	b3	b	3	7	162
Biognosys standards	TPVISGGPYEYR	669.838	2	1140.57	1	y10	y	10	5	458
Biognosys standards	TPVISGGPYEYR	669.838	2	1041.5	1	y9	y	9	2	1188
Biognosys standards	TPVISGGPYEYR	669.838	2	928.416	1	y8	y	8	1	2012
Biognosys standards	TPVISGGPYEYR	669.838	2	841.384	1	y7	y	7	4	668
Biognosys standards	TPVISGGPYEYR	669.838	2	784.362	1	y6	y	6	9	243
Biognosys standards	DGLDAASYYAPVR	699.338	2	1112.54	1	y10	y	10	3	890
Biognosys standards	DGLDAASYYAPVR	699.338	2	997.51	1	y9	y	9	5	766
Biognosys standards	DGLDAASYYAPVR	699.338	2	926.473	1	y8	y	8	2	1148
Biognosys standards	DGLDAASYYAPVR	699.338	2	855.436	1	y7	y	7	1	1528
Biognosys standards	DGLDAASYYAPVR	699.338	2	605.341	1	y5	y	5	4	800
Biognosys standards	ADVTPADFSEWSK	726.836	2	1066.48	1	y9	y	9	1	628
Biognosys standards	ADVTPADFSEWSK	726.836	2	969.431	1	y8	y	8	9	65
Biognosys standards	ADVTPADFSEWSK	726.836	2	898.394	1	y7	y	7	4	92
Biognosys standards	ADVTPADFSEWSK	726.836	2	420.224	1	y3	y	3	6	77
Biognosys standards	ADVTPADFSEWSK	726.836	2	387.187	1	b4	b	4	2	203
Biognosys standards	GTFIIDPGGVIR	622.854	2	939.562	1	y9	y	9	7	98
Biognosys standards	GTFIIDPGGVIR	622.854	2	826.478	1	y8	y	8	2	362
Biognosys standards	GTFIIDPGGVIR	622.854	2	713.394	1	y7	y	7	4	261
Biognosys standards	GTFIIDPGGVIR	622.854	2	598.367	1	y6	y	6	1	1052
Biognosys standards	GTFIIDPGGVIR	622.854	2	419.229	1	b4	b	4	6	122
Biognosys standards	GTFIIDPAAVIR	636.869	2	967.593	1	y9	y	9	7	192
Biognosys standards	GTFIIDPAAVIR	636.869	2	854.509	1	y8	y	8	2	884
Biognosys standards	GTFIIDPAAVIR	636.869	2	741.425	1	y7	y	7	3	728
Biognosys standards	GTFIIDPAAVIR	636.869	2	626.398	1	y6	y	6	1	1936
Biognosys standards	GTFIIDPAAVIR	636.869	2	419.229	1	b4	b	4	5	288
tr|Q9UAM5|Q9UAM5_Bla g 1.0101	IIELIR	378.753	2	378.753	2	precursor	precursor
tr|Q9UAM5|Q9UAM5_Bla g 1.0101	IIELIR	378.753	2	379.254	2	precursor [M+1]	precursor
tr|Q9UAM5|Q9UAM5_Bla g 1.0101	IIELIR	378.753	2	379.755	2	precursor [M+2]	precursor
tr|Q9UAM5|Q9UAM5_Bla g 1.0101	IIELIR	378.753	2	643.414	1	y5	y	5	2	278
tr|Q9UAM5|Q9UAM5_Bla g 1.0101	IIELIR	378.753	2	530.33	1	y4	y	4	1	900
tr|Q9UAM5|Q9UAM5_Bla g 1.0101	IIELIR	378.753	2	401.287	1	y3	y	3	3	135
tr|Q9UAM5|Q9UAM5_Bla g 1.0101	IIELIR	378.753	2	227.175	1	b2	b	2	4	122
tr|Q9UAM5|Q9UAM5_Bla g 1.0101	ALFNEK	361.198	2	361.198	2	precursor	precursor
tr|Q9UAM5|Q9UAM5_Bla g 1.0101	ALFNEK	361.198	2	361.699	2	precursor [M+1]	precursor
tr|Q9UAM5|Q9UAM5_Bla g 1.0101	ALFNEK	361.198	2	362.2	2	precursor [M+2]	precursor
tr|Q9UAM5|Q9UAM5_Bla g 1.0101	ALFNEK	361.198	2	650.351	1	y5	y	5	3	14
tr|Q9UAM5|Q9UAM5_Bla g 1.0101	ALFNEK	361.198	2	537.267	1	y4	y	4	1	81
tr|Q9UAM5|Q9UAM5_Bla g 1.0101	ALFNEK	361.198	2	390.198	1	y3	y	3	2	27
tr|Q9UAM5|Q9UAM5_Bla g 1.0101	ALFNEK	361.198	2	276.155	1	y2	y	2	4	7
tr|Q9UAM5|Q9UAM5_Bla g 1.0101	GVGITGLIDDVLAILPLDDLK	717.415	3	717.415	3	precursor	precursor
tr|Q9UAM5|Q9UAM5_Bla g 1.0101	GVGITGLIDDVLAILPLDDLK	717.415	3	717.75	3	precursor [M+1]	precursor
tr|Q9UAM5|Q9UAM5_Bla g 1.0101	GVGITGLIDDVLAILPLDDLK	717.415	3	718.084	3	precursor [M+2]	precursor
tr|Q9UAM5|Q9UAM5_Bla g 1.0101	GVGITGLIDDVLAILPLDDLK	717.415	3	997.593	1	y9	y	9	3	10
tr|Q9UAM5|Q9UAM5_Bla g 1.0101	GVGITGLIDDVLAILPLDDLK	717.415	3	813.472	1	y7	y	7	2	14
tr|Q9UAM5|Q9UAM5_Bla g 1.0101	GVGITGLIDDVLAILPLDDLK	717.415	3	700.388	1	y6	y	6	1	48
tr|Q9UAM5|Q9UAM5_Bla g 1.0101	GVGITGLIDDVLAILPLDDLK	717.415	3	1040.56	1	b11	b	11	4	9
tr|Q9UAM5|Q9UAM5_Bla g 1.0101	LETSPDFLALYNAIK	847.954	2	847.954	2	precursor	precursor
tr|Q9UAM5|Q9UAM5_Bla g 1.0101	LETSPDFLALYNAIK	847.954	2	848.455	2	precursor [M+1]	precursor
tr|Q9UAM5|Q9UAM5_Bla g 1.0101	LETSPDFLALYNAIK	847.954	2	848.957	2	precursor [M+2]	precursor
tr|Q9UAM5|Q9UAM5_Bla g 1.0101	LETSPDFLALYNAIK	847.954	2	1264.69	1	y11	y	11	1	6
tr|Q9UAM5|Q9UAM5_Bla g 1.0101	LETSPDFLALYNAIK	847.954	2	792.461	1	y7	y	7	3	4
tr|Q9UAM5|Q9UAM5_Bla g 1.0101	LETSPDFLALYNAIK	847.954	2	608.34	1	y5	y	5	4	3
tr|Q9UAM5|Q9UAM5_Bla g 1.0101	LETSPDFLALYNAIK	847.954	2	243.134	1	b2	b	2	2	5
sp|P54958|ASP2_Bla g 2.0101	LVHVFINTQYAGITK	568.654	3	568.654	3	precursor	precursor
sp|P54958|ASP2_Bla g 2.0101	LVHVFINTQYAGITK	568.654	3	568.988	3	precursor [M+1]	precursor
sp|P54958|ASP2_Bla g 2.0101	LVHVFINTQYAGITK	568.654	3	569.323	3	precursor [M+2]	precursor
sp|P54958|ASP2_Bla g 2.0101	LVHVFINTQYAGITK	568.654	3	652.366	1	y6	y	6	1	596
sp|P54958|ASP2_Bla g 2.0101	LVHVFINTQYAGITK	568.654	3	489.303	1	y5	y	5	2	243
sp|P54958|ASP2_Bla g 2.0101	LVHVFINTQYAGITK	568.654	3	248.16	1	y2	y	2	4	226
sp|P54958|ASP2_Bla g 2.0101	LVHVFINTQYAGITK	568.654	3	350.219	1	b3	b	3	3	240
sp|P54958|ASP2_Bla g 2.0101	YISDGNVQVK	561.793	2	561.793	2	precursor	precursor
sp|P54958|ASP2_Bla g 2.0101	YISDGNVQVK	561.793	2	562.295	2	precursor [M+1]	precursor
sp|P54958|ASP2_Bla g 2.0101	YISDGNVQVK	561.793	2	562.796	2	precursor [M+2]	precursor
sp|P54958|ASP2_Bla g 2.0101	YISDGNVQVK	561.793	2	846.432	1	y8	y	8	1	232
sp|P54958|ASP2_Bla g 2.0101	YISDGNVQVK	561.793	2	759.4	1	y7	y	7	4	17
sp|P54958|ASP2_Bla g 2.0101	YISDGNVQVK	561.793	2	644.373	1	y6	y	6	3	35
sp|P54958|ASP2_Bla g 2.0101	YISDGNVQVK	561.793	2	277.155	1	b2	b	2	2	54
sp|P54958|ASP2_Bla g 2.0101	FFDTGSAVGR	528.759	2	528.759	2	precursor	precursor
sp|P54958|ASP2_Bla g 2.0101	FFDTGSAVGR	528.759	2	529.261	2	precursor [M+1]	precursor
sp|P54958|ASP2_Bla g 2.0101	FFDTGSAVGR	528.759	2	529.762	2	precursor [M+2]	precursor
sp|P54958|ASP2_Bla g 2.0101	FFDTGSAVGR	528.759	2	762.374	1	y8	y	8	1	766
sp|P54958|ASP2_Bla g 2.0101	FFDTGSAVGR	528.759	2	647.347	1	y7	y	7	2	364
sp|P54958|ASP2_Bla g 2.0101	FFDTGSAVGR	528.759	2	546.299	1	y6	y	6	3	241
sp|P54958|ASP2_Bla g 2.0101	FFDTGSAVGR	528.759	2	295.144	1	b2	b	2	4	182
sp|P54958|ASP2_Bla g 2.0101	IGDTTVAPAGTQAIIDTSK	929.991	2	929.991	2	precursor	precursor
sp|P54958|ASP2_Bla g 2.0101	IGDTTVAPAGTQAIIDTSK	929.991	2	930.493	2	precursor [M+1]	precursor
sp|P54958|ASP2_Bla g 2.0101	IGDTTVAPAGTQAIIDTSK	929.991	2	930.994	2	precursor [M+2]	precursor
sp|P54958|ASP2_Bla g 2.0101	IGDTTVAPAGTQAIIDTSK	929.991	2	1371.75	1	y14	y	14	4	20
sp|P54958|ASP2_Bla g 2.0101	IGDTTVAPAGTQAIIDTSK	929.991	2	1272.68	1	y13	y	13	2	54
sp|P54958|ASP2_Bla g 2.0101	IGDTTVAPAGTQAIIDTSK	929.991	2	1201.64	1	y12	y	12	1	135
sp|P54958|ASP2_Bla g 2.0101	IGDTTVAPAGTQAIIDTSK	929.991	2	450.219	1	y4	y	4	3	27
sp|P54958|ASP2_Bla g 2.0101	IPSLPDVTFVINGR	764.43	2	764.43	2	precursor	precursor
sp|P54958|ASP2_Bla g 2.0101	IPSLPDVTFVINGR	764.43	2	764.932	2	precursor [M+1]	precursor
sp|P54958|ASP2_Bla g 2.0101	IPSLPDVTFVINGR	764.43	2	765.433	2	precursor [M+2]	precursor
sp|P54958|ASP2_Bla g 2.0101	IPSLPDVTFVINGR	764.43	2	1317.72	1	y12	y	12	4	31
sp|P54958|ASP2_Bla g 2.0101	IPSLPDVTFVINGR	764.43	2	1117.6	1	y10	y	10	1	195
sp|P54958|ASP2_Bla g 2.0101	IPSLPDVTFVINGR	764.43	2	905.52	1	y8	y	8	2	43
sp|P54958|ASP2_Bla g 2.0101	IPSLPDVTFVINGR	764.43	2	298.176	1	b3	b	3	3	35
sp|O18598|GST1_Bla g 5.0101	VLGLPAIK	405.776	2	405.776	2	precursor	precursor
sp|O18598|GST1_Bla g 5.0101	VLGLPAIK	405.776	2	406.278	2	precursor [M+1]	precursor
sp|O18598|GST1_Bla g 5.0101	VLGLPAIK	405.776	2	406.779	2	precursor [M+2]	precursor
sp|O18598|GST1_Bla g 5.0101	VLGLPAIK	405.776	2	711.476	1	y7	y	7	3	5360
sp|O18598|GST1_Bla g 5.0101	VLGLPAIK	405.776	2	598.392	1	y6	y	6	1	17408
sp|O18598|GST1_Bla g 5.0101	VLGLPAIK	405.776	2	428.287	1	y4	y	4	2	7392
