# Supplementary material for: Variability in German Cockroach Extract Composition Greatly Impacts T Cell Potency in Cockroach-Allergic Donors
Source: Front Immunol. 2019 Feb 27;10:313. doi: 10.3389/fimmu.2019.00313 (PMC6413722; doi:10.3389/fimmu.2019.00313)
Supplement: Supplemental Table 2 — Levels of spontaneous cytkine release at day 14 in the absence of additional extract stimulation. [file Table_2.XLSX]

## Sheet: Sheet1
		Supplemental Table 2. Levels of spontaneous cytkine release at day 14 in the absence of additional extract stimulation.
		IFNg- SFC per 106 PBMC			IL-5- SFC per 106 PBMC			IL-10- SFC per 106 PBMC
	Donor	Reading 1	Reading 2	Reading 3	Reading 1	Reading 2	Reading 3	Reading 1	Reading 2	Reading 3
	2210	10	30	60	10	0	0	40	80	60
	1437	20	60	50	0	0	10	260	310	330
	1175	80	220	130	20	0	10	330	510	450
	1406	210	230	420	0	10	30	360	380	320
	1445	30	40	40	0	0	10	80	70	80
	1277	10	60	40	20	10	10	110	120	150
	1228	130	130	130	10	0	0	320	350	260
	1424	10	70	80	10	0	0	220	240	220
	1425	60	40	30	10	0	0	70	50	10
	1398	20	70	30	0	10	0	190	210	220
	1864	10	10	30	10	0	0	160	130	90
	1231	40	30	70	10	0	0	120	40	170
	2083	80	90	210	10	0	0	210	140	330
